# Supplementary material
Source: publisher figshare collection journal article supplement (https://frontiersin.figshare.com/ndownloader/files/25050080)
Supplement: Supplementary file [file 25050080]

**Supplementary Table 1.** Comparison between pre- and post-test students' knowledge towards bioinformatics, gene regulation and genomics.

|           |                                                                                                                                                                       | Control Group<br>(Pre-test vs. Post-test) |        |      | Experimental Group<br>(Pre-test vs. Post-test) |        |      |
|-----------|-----------------------------------------------------------------------------------------------------------------------------------------------------------------------|-------------------------------------------|--------|------|------------------------------------------------|--------|------|
|           |                                                                                                                                                                       | n                                         | p      | Phi  | n                                              | p      | Phi  |
|           |                                                                                                                                                                       |                                           |        |      |                                                |        |      |
| Knowledge | Q1: Have you heard about bioinformatics?                                                                                                                              | 94                                        | -      | -    | 292                                            | <0.01* | 0.08 |
|           | Q2: Imagine the following situation: "As a researcher, you sequence a genomic fragment. Do you have any idea how you would proceed to identify the gene (s) present?" | 95                                        | <0.01* | 0.21 | 281                                            | <0.01* | 0.20 |
|           | Q5: Have you heard about comparative genomics?                                                                                                                        | 94                                        | <0.01* | 0.11 | 289                                            | <0.01* | 0.08 |
|           | Q6.1: Databases are free access resources.                                                                                                                            | 25                                        | 0.04*  | 0.32 | 105                                            | <0.01* | 0.19 |
|           | Q6.2: All citizens have access to the main genomic databases.                                                                                                         | 52                                        | 0.02*  | 0.28 | 165                                            | <0.01* | 0.14 |
|           | Q6.3: All bioinformatics tools require programming skills.                                                                                                            | 80                                        | <0.01* | 0.21 | 223                                            | <0.01* | 0.08 |
|           | Q6.4: Bioinformatics tools are essential to molecular biology studies.                                                                                                | 62                                        | 0.22   | 0.25 | 199                                            | 0.52   | 0.21 |

n – number of participants; McNemar test for a 95% confidence interval; Phi – Phi coefficient measure of effect size. (\*) indicates significant differences between pre- and post-test to each group.
